# Supplementary material for: Gametocyte carriage in uncomplicated Plasmodium falciparum malaria following treatment with artemisinin combination therapy: a systematic review and meta-analysis of individual patient data
Source: PubMed Central journal article supplement (PMC4879753; doi:10.1186/s12916-016-0621-7), 2016-05-24
Supplement: 12916_2016_621_MOESM6_ESM.pdf [file 12916_2016_621_MOESM6_ESM.pdf]

Supplementary Table 55.

| study id         | ACT                               | Study design<br>Arm <sup>1</sup> | Randomization                         |                                  |                                                                             |                                 | Treatment Supervision        | Protocol<br>exclusions <sup>2</sup> | Missing covariates |        |       | Missing outcome             |                                       |                                       | Assessment of<br>gametocytæmia <sup>7</sup> |                                   |               |
|------------------|-----------------------------------|----------------------------------|---------------------------------------|----------------------------------|-----------------------------------------------------------------------------|---------------------------------|------------------------------|-------------------------------------|--------------------|--------|-------|-----------------------------|---------------------------------------|---------------------------------------|---------------------------------------------|-----------------------------------|---------------|
|                  |                                   |                                  | Concealment of Treatment <sup>1</sup> | Sequence Generation <sup>1</sup> | Treatment Blinding <sup>1</sup>                                             | Randomisation <sup>1</sup>      |                              |                                     | age                | weight | fever | haemoglobin<br>/haematocrit | time to<br>gametocytæmia <sup>3</sup> | time to<br>gametocytæmia <sup>5</sup> |                                             | time to<br>clearance <sup>6</sup> |               |
| study identifier | involving ASAQ,<br>ASMQ, AL or DP | number of arms                   |                                       |                                  |                                                                             |                                 |                              |                                     |                    |        |       |                             |                                       |                                       |                                             |                                   |               |
| ADXZ             | Yes                               | Single                           | NA                                    | NA                               | NA                                                                          | NA                              | Supervised                   | 0%                                  | 0%                 | 0%     | 3%    | 0%                          | 0%                                    | 100%                                  | 0%                                          | 3                                 |               |
| AJXCU            | Yes                               | Multiple                         | Yes                                   | Sealed envelopes                 | Computer generated                                                          | Open label                      | Supervised                   | 0%                                  | 0%                 | 0%     | 0%    | 0%                          | 1%                                    | 96%                                   | 0%                                          | 4                                 |               |
| BJUNF            | Yes                               | Multiple                         | Yes                                   | Sealed envelopes                 | Blocks of 12<br>Computer generated,                                         | Open label                      | Supervised                   | 0%                                  | 0%                 | 0%     | 0%    | 0%                          | 0%                                    | No data <sup>8</sup>                  | NA                                          | No data                           | 4             |
| BKTS             | Yes                               | Multiple                         | Yes                                   | Sealed envelopes                 | blocks of 12                                                                | Neither patients nor clinicians | Supervised                   | 0%                                  | 0%                 | 0%     | 0%    | 0%                          | 0%                                    | No data                               | NA                                          | No data                           | 3             |
| BMQYT            | Yes                               | Multiple                         | Yes                                   | Not mentioned                    | Blocks of 12                                                                | Single-blinded                  | Supervised                   | 0%                                  | 0%                 | 0%     | 0%    | 0%                          | 0%                                    | 0%                                    | 0%                                          | 0%                                | 4             |
| BQSYZ            | Yes                               | Multiple                         | Yes                                   | Not mentioned                    | Not mentioned                                                               | Open label                      | Supervised                   | 0%                                  | 0%                 | 0%     | 0%    | 8%                          | 0%                                    | 3%                                    | 95%                                         | 0%                                | Not Available |
| BSCRC            | No                                | NA                               | NA                                    | NA                               | NA                                                                          | NA                              | NA                           | 3%                                  | 0%                 | 0%     | 0%    | 19%                         | 0%                                    | NA                                    | NA                                          | NA                                | 3             |
| BSXFP            | Yes                               | Multiple                         | Yes                                   | Sealed envelopes                 | Computer generated                                                          | Open label                      | Supervised                   | 0%                                  | 0%                 | 0%     | 0%    | 0%                          | 0%                                    | No data                               | NA                                          | No data                           | 3             |
| CCEPC            | Yes                               | Multiple                         | Yes                                   | Treatment allocation was con     | Computer generated, blocks                                                  | Not applicable                  | Supervised/Unsupervised      | 0%                                  | 0%                 | 0%     | 0%    | 0%                          | 0%                                    | 1%                                    | 92%                                         | 0%                                | 2             |
| CCXPJ            | Yes                               | Multiple                         | Yes                                   | Not mentioned                    | Not mentioned                                                               | Single-blinded                  | Supervised                   | 1%                                  | 0%                 | 0%     | 0%    | 100%                        | 0%                                    | No data                               | NA                                          | No data                           | 4             |
| CDCMJ            | Yes                               | Multiple                         | Yes                                   | Treatment allocation was con     | Drawing envelope from the                                                   | Open label                      | Partially supervised         | 0%                                  | 0%                 | 0%     | 100%  | 0%                          | 0%                                    | 0%                                    | 91%                                         | 0%                                | 3             |
| CFZFN            | Yes                               | Multiple                         | Yes                                   | Not mentioned                    | Not mentioned                                                               | Not mentioned                   | Supervised                   | 1%                                  | 0%                 | 0%     | 1%    | 8%                          | 0%                                    | 10%                                   | 38%                                         | 0%                                | 3             |
| CUDNY            | Yes                               | Multiple                         | Yes                                   | Sealed envelopes                 | Computer generated                                                          | Open label                      | Supervised                   | 3%                                  | 0%                 | 100%   | 100%  | 100%                        | 0%                                    | 99%                                   | 1%                                          | No data                           | 4             |
| CKYJT            | Yes                               | Single                           | NA                                    | NA                               | NA                                                                          | NA                              | Supervised                   | 0%                                  | 0%                 | 0%     | 2%    | 100%                        | 0%                                    | 1%                                    | 0%                                          | No data                           | 2             |
| DADPZ            | Yes                               | Multiple                         | Yes                                   | Sealed envelopes                 | Computer generated                                                          | Open label                      | Supervised/Partially supervi | 0%                                  | 0%                 | 0%     | 0%    | 0%                          | 0%                                    | 3%                                    | 97%                                         | No data                           | 4             |
| DAXCM            | Yes                               | Multiple                         | Yes                                   | Not mentioned                    | Computer generated                                                          | Patients were treatment b       | Supervised                   | 0%                                  | 0%                 | 1%     | 0%    | 100%                        | 10%                                   | 9%                                    | 4%                                          | 48%                               | 1             |
| DBCYT            | Yes                               | Multiple                         | Yes                                   | Not mentioned                    | Not mentioned                                                               | Single-blinded                  | Supervised                   | 71%                                 | 0%                 | 100%   | 0%    | 0%                          | 0%                                    | 2%                                    | 2%                                          | No data                           | 4             |
| DFTUS            | Yes                               | Multiple                         | Yes                                   | Not mentioned                    | Not mentioned                                                               | Not mentioned                   | Supervised                   | 0%                                  | 0%                 | 1%     | 0%    | 3%                          | 24%                                   | 3%                                    | 93%                                         | 0%                                | Not available |
| DPZDY            | No                                | NA                               | NA                                    | NA                               | NA                                                                          | NA                              | NA                           | 3%                                  | 0%                 | 0%     | 0%    | 0%                          | 0%                                    | NA                                    | NA                                          | NA                                | 2             |
| DYFKY            | Yes                               | Multiple                         | Randomized                            | Sealed envelopes                 | Independent statistician, blo                                               | Open label                      | Supervised                   | 0%                                  | 0%                 | 0%     | 1%    | 0%                          | 0%                                    | 9%                                    | 82%                                         | 0%                                | 4             |
| EDBPX            | Yes                               | Multiple                         | Yes                                   | Treatment allocation was con     | Blocks of 15                                                                | Open label                      | Supervised                   | 0%                                  | 0%                 | 1%     | 0%    | 0%                          | 0%                                    | 31%                                   | 63%                                         | 38%                               | 2             |
| EDPJN            | Yes                               | Multiple                         | Yes                                   | Randomisation lists were kept    | Computer generated                                                          | Investigator blinded            | Supervised                   | 0%                                  | 0%                 | 0%     | 0%    | 100%                        | 0%                                    | No data                               | NA                                          | No data                           | 3             |
| EFFTU            | Yes                               | Multiple                         | Yes                                   | Not mentioned                    | Blocks of 6                                                                 | Double blind                    | Supervised                   | 1%                                  | 0%                 | 0%     | 3%    | 100%                        | 0%                                    | 3%                                    | 63%                                         | 13%                               | 2             |
| EGYMA            | Yes                               | Multiple                         | Yes                                   | Sealed envelopes                 | Block randomization                                                         | Open label                      | Supervised                   | 62%                                 | 0%                 | 0%     | 0%    | 100%                        | 0%                                    | 3%                                    | 94%                                         | 6%                                | 3             |
| EKDTF            | No                                | NA                               | NA                                    | NA                               | NA                                                                          | NA                              | NA                           | 8%                                  | 0%                 | 0%     | 0%    | 0%                          | 1%                                    | NA                                    | NA                                          | NA                                | Not available |
| EMJMA            | Yes                               | Multiple                         | Yes                                   | Sealed envelopes                 | Blocks of 12                                                                | Open label                      | Supervised                   | 1%                                  | 0%                 | 0%     | 0%    | 5%                          | 0%                                    | 4%                                    | 66%                                         | 5%                                | 3             |
| EPDUY            | Yes                               | Multiple                         | Yes                                   | Sealed envelopes                 | Computer generated, blocks                                                  | The investigators recruitin     | Supervised                   | 0%                                  | 0%                 | 0%     | 0%    | 3%                          | 0%                                    | No data                               | No data                                     | No data                           | 4             |
| ESGDS            | No                                | NA                               | NA                                    | NA                               | NA                                                                          | NA                              | NA                           | 64%                                 | 0%                 | 0%     | 0%    | 3%                          | 0%                                    | NA                                    | NA                                          | NA                                | 3             |
| ETFZC            | Yes                               | Multiple                         | Yes                                   | Not mentioned                    | Computer generated                                                          | Blinded                         | Supervised                   | 0%                                  | 0%                 | 0%     | 0%    | 0%                          | 0%                                    | No data                               | NA                                          | No data                           | 4             |
| ETZJD            | No                                | NA                               | NA                                    | NA                               | NA                                                                          | NA                              | NA                           | 0%                                  | 0%                 | 4%     | 0%    | 100%                        | 3%                                    | NA                                    | NA                                          | NA                                | 2             |
| FAJXQ            | Yes                               | Multiple                         | Yes                                   | Sealed envelopes                 | predetermined randomizati                                                   | Open label                      | Supervised                   | 0%                                  | 0%                 | 0%     | 0%    | 0%                          | 0%                                    | 1%                                    | 96%                                         | 10%                               | 4             |
| FARTM            | No                                | NA                               | NA                                    | NA                               | NA                                                                          | NA                              | NA                           | 6%                                  | 0%                 | 0%     | 0%    | 3%                          | 70%                                   | NA                                    | NA                                          | NA                                | 3             |
| FBDEZ            | No                                | NA                               | NA                                    | NA                               | NA                                                                          | NA                              | NA                           | 0%                                  | 0%                 | 0%     | 0%    | 100%                        | 0%                                    | NA                                    | NA                                          | NA                                | 4             |
| FEDZY            | Yes                               | Multiple                         | Yes                                   | Sealed envelopes                 | Computer generated, blocks                                                  | Open label                      | Supervised                   | 1%                                  | 0%                 | 0%     | 0%    | 0%                          | 0%                                    | 4%                                    | 1%                                          | 75%                               | 3             |
| FFNAU            | Yes                               | Multiple                         | Yes                                   | Sealed envelopes                 | Blocks of 10                                                                | Open label                      | Supervised                   | 0%                                  | 0%                 | 0%     | 0%    | 0%                          | 0%                                    | 1%                                    | 91%                                         | 1%                                | 2             |
| FHMZF            | Yes                               | Multiple                         | Yes                                   | Sealed envelopes                 | Computer generated, blocks                                                  | both patient and investiga      | Supervised                   | 2%                                  | 0%                 | 0%     | 0%    | 57%                         | 0%                                    | No data                               | NA                                          | No data                           | 2             |
| FMNBN            | Yes                               | Multiple                         | Yes                                   | Sealed envelopes                 | Blocks of 4                                                                 | Open label                      | Supervised                   | 0%                                  | 0%                 | 0%     | 0%    | 2%                          | 0%                                    | 5%                                    | 69%                                         | 0%                                | 3             |
| FMNDP            | Yes                               | Multiple                         | Not mentioned                         | Not mentioned                    | Not mentioned                                                               | Not mentioned                   | Not mentioned                | 0%                                  | 0%                 | 0%     | 0%    | 0%                          | 0%                                    | No data                               | NA                                          | No data                           | 4             |
| FXFTC            | Yes                               | Multiple                         | Yes                                   | Not mentioned                    | Computer generated                                                          | Blinded                         | Supervised                   | 0%                                  | 0%                 | 0%     | 0%    | 0%                          | 0%                                    | No data                               | NA                                          | No data                           | 4             |
| GHNKU            | Yes                               | Multiple                         | Yes                                   | Not mentioned                    | Not mentioned                                                               | Open label                      | Supervised                   | 2%                                  | 0%                 | 100%   | 56%   | 100%                        | 0%                                    | 1%                                    | 89%                                         | 5%                                | 2             |
| GHYRA            | No                                | NA                               | NA                                    | NA                               | NA                                                                          | NA                              | NA                           | 2%                                  | 0%                 | 2%     | 0%    | 2%                          | 1%                                    | NA                                    | NA                                          | NA                                | Not available |
| GPXIK            | Yes                               | Multiple                         | Yes                                   | Sealed envelopes                 | Randomised list                                                             | Open label                      | Supervised                   | 0%                                  | 0%                 | 0%     | 0%    | 0%                          | 0%                                    | 4%                                    | 87%                                         | 4%                                | 4             |
| GOBEK            | Yes                               | Single                           | NA                                    | NA                               | NA                                                                          | NA                              | Supervised                   | 1%                                  | 0%                 | 0%     | 0%    | 7%                          | 0%                                    | 3%                                    | 44%                                         | 22%                               | 2             |
| GTEFH            | Yes                               | Multiple                         | Yes                                   | Cards                            | Drawing from box, blocks of                                                 | Not mentioned                   | Supervised                   | 0%                                  | 0%                 | 1%     | 1%    | 1%                          | 0%                                    | 1%                                    | 95%                                         | 0%                                | 4             |
| GZQDA            | Yes                               | Multiple                         | Yes                                   | Sealed envelopes                 | Computer generated, blocks                                                  | Open label                      | Supervised/Unsupervised      | 0%                                  | 0%                 | 0%     | 0%    | 3%                          | 0%                                    | 2%                                    | 92%                                         | 0%                                | 2             |
| HCEMT            | Yes                               | Multiple                         | Yes                                   | Not mentioned                    | Not mentioned                                                               | Open label                      | Supervised                   | 0%                                  | 0%                 | 0%     | 1%    | 100%                        | 0%                                    | 1%                                    | 1%                                          | 8%                                | 1             |
| HCGRD            | Yes                               | Multiple                         | NA                                    | NA                               | NA                                                                          | NA                              | NA                           | 26%                                 | 0%                 | 1%     | 0%    | 0%                          | 0%                                    | 3%                                    | 97%                                         | 6%                                | 2             |
| HUNDX            | Yes                               | Multiple                         | Not mentioned                         | Not mentioned                    | Not mentioned                                                               | Not mentioned                   | Supervised                   | 0%                                  | 0%                 | 0%     | 0%    | 0%                          | 0%                                    | 2%                                    | 95%                                         | 0%                                | Not available |
| HMPBZ            | Yes                               | Multiple                         | Not mentioned                         | Not mentioned                    | Not mentioned<br>Independent off site<br>contract<br>research organisation, | Not mentioned                   | Partially supervised         | 1%                                  | 0%                 | 100%   | 0%    | 7%                          | 0%                                    | 0%                                    | 0%                                          | 0%                                | Not available |
| IJGNM            | Yes                               | Multiple                         | Yes                                   | Sealed envelopes                 | stratified by country                                                       | Open label                      | Supervised                   | 1%                                  | 0%                 | 0%     | 0%    | 3%                          | 0%                                    | 2%                                    | 92%                                         | 5%                                | 2             |
| JNCS             | No                                | NA                               | NA                                    | NA                               | NA                                                                          | NA                              | NA                           | 1%                                  | 0%                 | 0%     | 0%    | 0%                          | 0%                                    | NA                                    | NA                                          | NA                                | 4             |
| JRBRK            | Yes                               | Multiple                         | NA                                    | NA                               | NA                                                                          | NA                              | Supervised                   | 1%                                  | 0%                 | 0%     | 0%    | 4%                          | 0%                                    | 0%                                    | 0%                                          | 0%                                | 3             |
| JTXEY            | Yes                               | Multiple                         | Yes                                   | Sealed envelopes                 | Computer generated, blocks                                                  | Open label                      | Unsupervised                 | 4%                                  | 0%                 | 8%     | 0%    | 0%                          | 0%                                    | 7%                                    | 10%                                         | 0%                                | 4             |
| JUTXU            | No                                | NA                               | NA                                    | NA                               | NA                                                                          | NA                              | NA                           | 6%                                  | 0%                 | 0%     | 0%    | 41%                         | 0%                                    | NA                                    | NA                                          | NA                                | 3             |
| JYDHH            | No                                | NA                               | NA                                    | NA                               | NA                                                                          | NA                              | NA                           | 0%                                  | 0%                 | 100%   | 0%    | 0%                          | 0%                                    | NA                                    | NA                                          | NA                                | 3             |
| JZCKF            | Yes                               | Single                           | NA                                    | NA                               | NA                                                                          | NA                              | Not mentioned                | 5%                                  | 0%                 | 0%     | 0%    | 0%                          | 0%                                    | 0%                                    | 98%                                         | 0%                                | 2             |
| KAXED            | No                                | NA                               | NA                                    | NA                               | NA                                                                          | NA                              | NA                           | 0%                                  | 0%                 | 0%     | 0%    | 1%                          | 0%                                    | NA                                    | NA                                          | NA                                | 3             |
| KDDBK            | No                                | NA                               | NA                                    | NA                               | NA                                                                          | NA                              | NA                           | 48%                                 | 0%                 | 0%     | 0%    | 0%                          | 0%                                    | NA                                    | NA                                          | NA                                | 3             |
| KJGJT            | Yes                               | Multiple                         | Yes                                   | Sealed envelopes                 | Computer generated, blocks                                                  | Open label                      | Supervised                   | 1%                                  | 0%                 | 0%     | 0%    | 2%                          | 0%                                    | 11%                                   | 86%                                         | 16%                               | 2             |
| KRBXE            | Yes                               | Multiple                         | Yes                                   | Sealed envelopes                 | Patient selects envelope fro                                                | Open label                      | Supervised/Unsupervised      | 0%                                  | 0%                 | 0%     | 0%    | 100%                        | 0%                                    | 1%                                    | 5%                                          | 47%                               | Not available |
| KTKAB            | Yes                               | Multiple                         | Yes                                   | Sealed envelopes                 | External statistician, blocks                                               | c only clinic staff was aware   | Supervised                   | 3%                                  | 0%                 | 0%     | 0%    | 1%                          | 1%                                    | 7%                                    | 4%                                          | 43%                               | 2             |
| KUCMZ            | No                                | NA                               | NA                                    | NA                               | NA                                                                          | NA                              | NA                           | 56%                                 | 0%                 | 0%     | 2%    | 12%                         | 0%                                    | NA                                    | NA                                          | NA                                | 3             |
| KZBZT            | Yes                               | Multiple                         | Yes                                   | Sealed envelopes                 | Computer generated                                                          | Not mentioned                   | Supervised                   | 0%                                  | 0%                 | 0%     | 100%  | 100%                        | 0%                                    | 4%                                    | 3%                                          | 0%                                | 3             |
| MCZHT            | Yes                               | Multiple                         | Yes                                   | Sealed envelopes                 | Computer generated                                                          | Only the study nurse was        | Supervised                   | 0%                                  | 0%                 | 0%     | 0%    | 0%                          | 0%                                    | 1%                                    | 98%                                         | 0%                                | 3             |
| MEFSC            | Yes                               | Multiple                         | Yes                                   | Randomization was done at t      | Provided by GlaxoSmithKline                                                 | Investigators, technicians      | Supervised                   | 1%                                  | 0%                 | 0%     | 0%    | 100%                        | 0%                                    | 1%                                    | 2%                                          | 0%                                | 3             |
| MGEEX            | Yes                               | Multiple                         | Yes                                   | Sealed envelopes                 | Provided by Sanofi                                                          | Double-blinded                  | Supervised                   | 0%                                  | 2%                 | 1%     | 1%    | 1%                          | 1%                                    | No data                               | NA                                          | No data                           | 4             |
| MRGRH            | No                                | NA                               | NA                                    | NA                               | NA                                                                          | NA                              | NA                           | 62%                                 | 0%                 | 1%     | 88%   | 3%                          | 0%                                    | NA                                    | NA                                          | NA                                | 3             |
| MTZZP            | Yes                               | Multiple                         | Yes                                   | Sealed envelopes                 | Blocks of 10                                                                | Open label                      | Supervised                   | 0%                                  | 0%                 | 0%     | 0%    | 0%                          | 0%                                    | No data                               | NA                                          | No data                           | 4             |
| MZBCX            | Yes                               | Multiple                         | Not mentioned                         | Not mentioned                    | The two therapies was alloc                                                 | Open label                      | Supervised                   | 1%                                  | 0%                 | 0%     | 0%    | 0%                          | 0%                                    | No data                               | NA                                          | No data                           | 4             |
| NBSAE            | Yes                               | Multiple                         | Yes                                   | Sealed envelopes                 | blocks                                                                      | Although this was an open       | Supervised                   | 0%                                  | 0%                 | 0%     | 0%    | 0%                          | 0%                                    | 1%                                    | 97%                                         | 0%                                | 4             |
| NIJCK            | Yes                               | Multiple                         | Yes                                   | Not mentioned                    | Not mentioned                                                               | Not mentioned                   | Supervised                   | 8%                                  | 0%                 | 0%     | 0%    | 0%                          | 0%                                    | 3%                                    | 90%                                         | 17%                               | Not available |
| NMMSB            | No                                | NA                               | NA                                    | NA                               | NA                                                                          | NA                              | NA                           | 0%                                  | 0%                 | 0%     | 0%    | 0%                          | 0%                                    | NA                                    | NA                                          | NA                                | Not available |
| NRXTM            | No                                | NA                               | NA                                    | NA                               | NA                                                                          | NA                              | NA                           | 1%                                  | 0%                 | 0%     | 0%    | 0%                          | 0%                                    | NA                                    | NA                                          | NA                                | 2             |
| PCGTT            | No                                | NA                               | NA                                    | NA                               | NA                                                                          | NA                              | NA                           | 6%                                  | 0%                 | 0%     | 0%    | 40%                         | 0%                                    | NA                                    | NA                                          | NA                                | 3             |
| PEADD            | No                                | NA                               | NA                                    | NA                               | NA                                                                          | NA                              | NA                           | 1%                                  | 0%                 | 0%     | 3%    | 3%                          | 3%                                    | NA                                    | NA                                          | NA                                | 2             |
| PKGFP            | Yes                               | Multiple                         | Yes                                   | Not mentioned                    | Not mentioned                                                               | Not mentioned                   | Supervised/Partially supervi | 0%                                  | 0%                 | 0%     | 0%    | 0%                          | 0%                                    | 1%                                    | 95%                                         | 0%                                | 4             |
| PKSCU            | No                                | NA                               | NA                                    | NA                               | NA                                                                          | NA                              | NA                           | 0%                                  | 0%                 | 100%   | 0%    | 0%                          | 0%                                    | NA                                    | NA                                          | NA                                | Not available |
| PNUNE            | Yes                               | single                           | NA                                    | NA                               | NA                                                                          | NA                              | Supervised                   | 18%                                 | 0%                 | 0%     | 0%    | 3%                          | 0%                                    | 0%                                    | 95%                                         | 0%                                | 3             |
| PUEKP            | Yes                               | Multiple                         | Yes                                   | Not mentioned                    | Computer generated                                                          | Open label                      | Supervised                   | 0%                                  | 0%                 | 0%     | 0%    | 1%                          | 0%                                    | 4%                                    | 0%                                          | 12%                               | 3             |
| PXPZX            | Yes                               | Multiple                         | Yes                                   | Sealed envelopes                 | Computer generated                                                          | Although this was an open       | Supervised                   | 0%                                  | 0%                 | 0%     | 0%    | 1%                          | 0%                                    | 1%                                    | 98%                                         | 9%                                | 4             |
| QBQPM            | No                                | NA                               | NA                                    | NA                               | NA                                                                          | NA                              | NA                           | 5%                                  | 0%                 | 0%     | 0%    | 0%                          | 4%                                    | NA                                    | NA                                          | NA                                | Not available |
| QCKHC            | Yes                               | Multiple                         | Yes                                   | Sealed envelopes                 | Independent statistician, blo                                               | Open label                      | Supervised                   | 36%                                 | 0%                 | 1%     | 0%    | 0%                          | 0%                                    | 9%                                    | 68%                                         | 46%                               | 2             |
| QFPXT            | Yes                               | Multiple                         | Yes                                   | Not mentioned                    | Computer generated                                                          | Blinded                         | Supervised                   | 1%                                  | 0%                 | 0%     | 0%    | 0%                          | 1%                                    | No data                               | NA                                          | No data                           | 4             |
| QBRRC            | Yes                               | Multiple                         | Yes                                   | Sealed envelopes                 | Computer generated, blocks                                                  | Open label                      | Supervised                   | 1%                                  | 0%                 | 0%     | 0%    | 0%                          | 1%                                    | 45%                                   | 47%                                         | 0%                                | 4             |
| QZIGM            | Yes                               | Multiple                         | Yes                                   | Sealed envelopes                 | organization                                                                |                                 |                              |                                     |                    |        |       |                             |                                       |                                       |                                             |                                   |               |
